# Supplementary material
Source: PubMed Central journal article supplement (PMC3161117)
Supplement: NIHMS317630-supplement-supplement_1.pdf [file NIHMS317630-supplement-supplement_1.pdf]

# Supplemental figure S1.

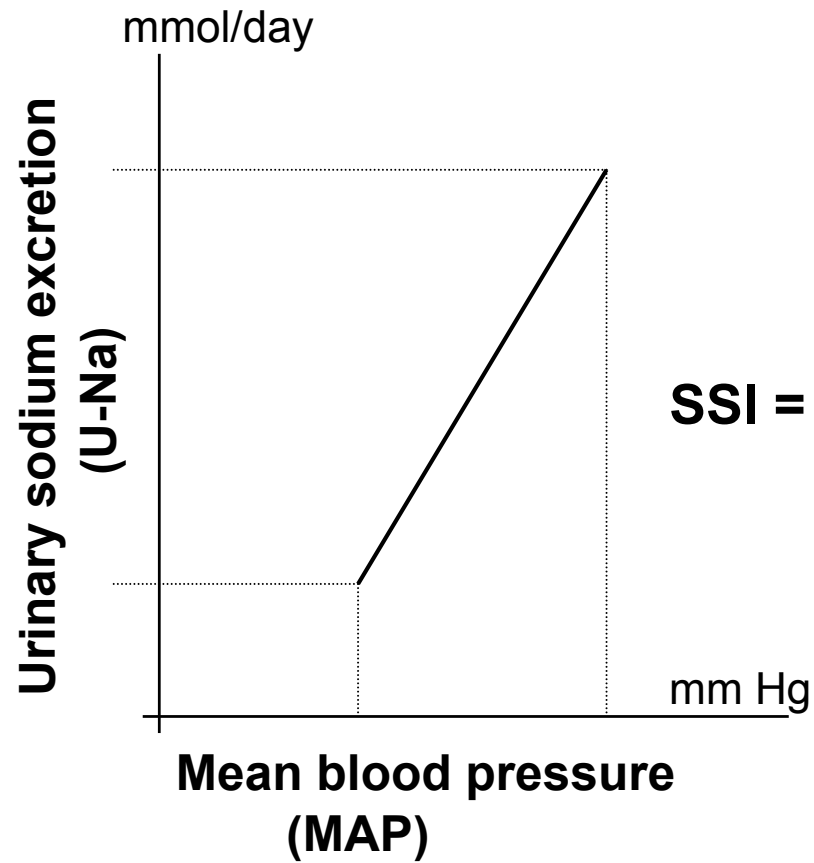

$$SSI = \frac{MAP(\text{normal salt diet}) - MAP(\text{low salt diet})}{U\text{-Na}(\text{normal salt diet}) - U\text{-Na}(\text{low salt diet})}$$

Pressure-natriuresis curve and calculation of salt sensitivity index. (SSI)
